# Supplementary material for: Hollow microspherical carbazole-based conjugated polymers by photoinduced step-growth polymerization
Source: Royal Society of Chemistry journal article supplement (doi:10.1039/d1py00822f), 2021-01-01
Supplement: d1py00822f1.pdf [file d1py00822f1.pdf]

Electronic Supplementary Material (ESI) for Polymer Chemistry.  
This journal is © The Royal Society of Chemistry 2021

## Electronic Supplementary Material (ESI)

### Hollow Microspherical Carbazole-Based Conjugated Polymers by Photoinduced step-growth Polymerization

Tugba Celiker<sup>a</sup>, Ali Suerkan<sup>a</sup>, Sinem Altinisik<sup>b</sup>, Mert Akgun<sup>c</sup>, Sermet Koyuncu<sup>\*b</sup>, Yusuf  
Yagci<sup>\*a,d</sup>

<sup>a</sup>*Istanbul Technical University, Department of Chemistry, 34469, Maslak, Istanbul, Turkey*

<sup>b</sup>*Canakkale Onsekiz Mart University, Department of Chemical Engineering, 17100, Canakkale, Turkey*

<sup>c</sup>*Canakkale Onsekiz Mart University, Science and Technology Application and Research Center, 17100,  
Canakkale, Turkey*

<sup>d</sup>*Faculty of Science, Chemistry Department, King Abdulaziz University, 21589 Jeddah, Saudi Arabia*

\*Corresponding authors.

E-mail: [skoyuncu@comu.edu.tr](mailto:skoyuncu@comu.edu.tr) (S. Koyuncu) and [yusuf@itu.edu.tr](mailto:yusuf@itu.edu.tr) (Y. Yagci).

## Table of Contents

**Figure S1.** FT-IR spectra of CBP and PCBP before and after dedoping.

**Figure S2.** TEM-EDX of PCBP before (a) and after dedoping (b) process.

**Figure S3.** DSC curves of PCBP before and after dedoping process.

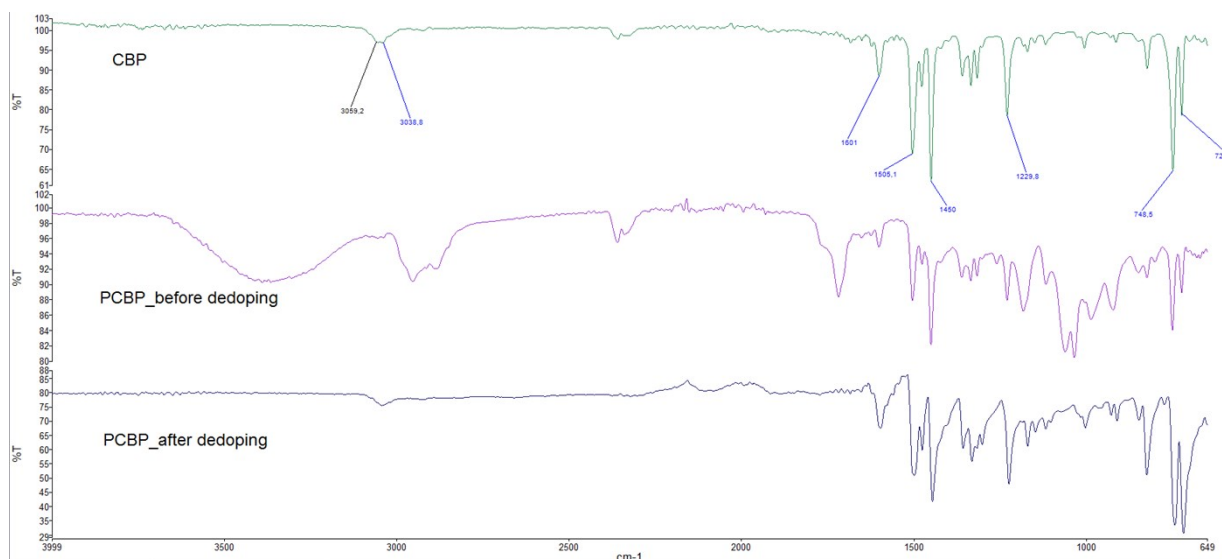

**Figure S1.** FT-IR spectra of CBP and PCBP before and after dedoping.

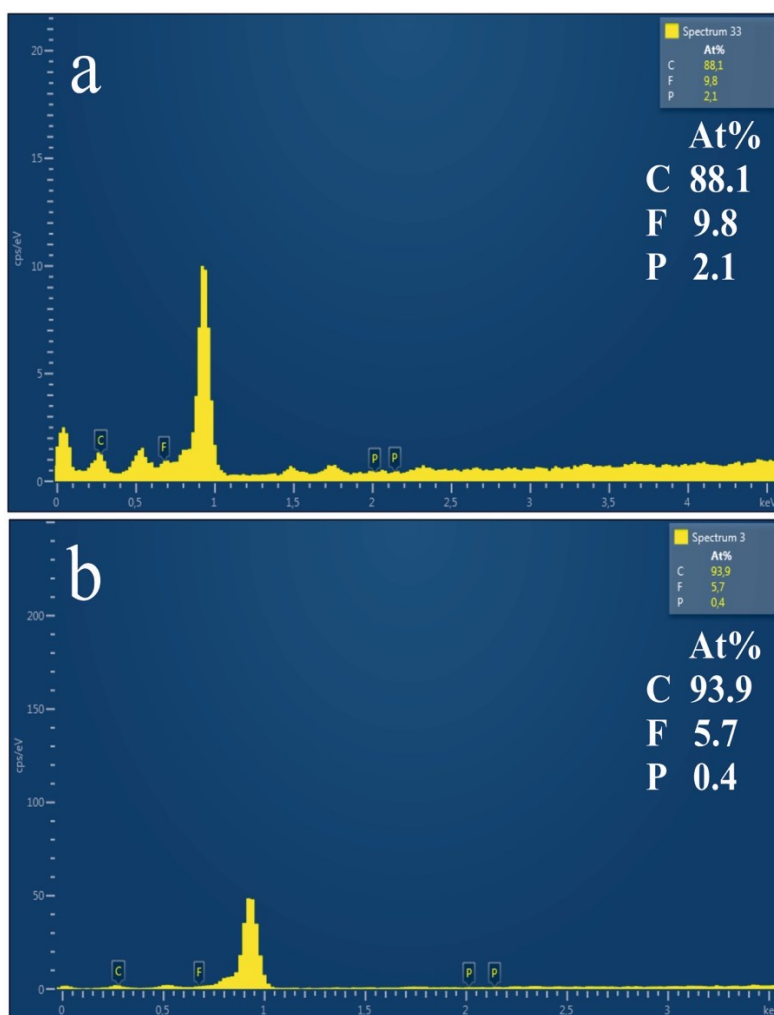

**Figure S2.** TEM-EDX of PCBP before (a) and after dedoping (b) process.

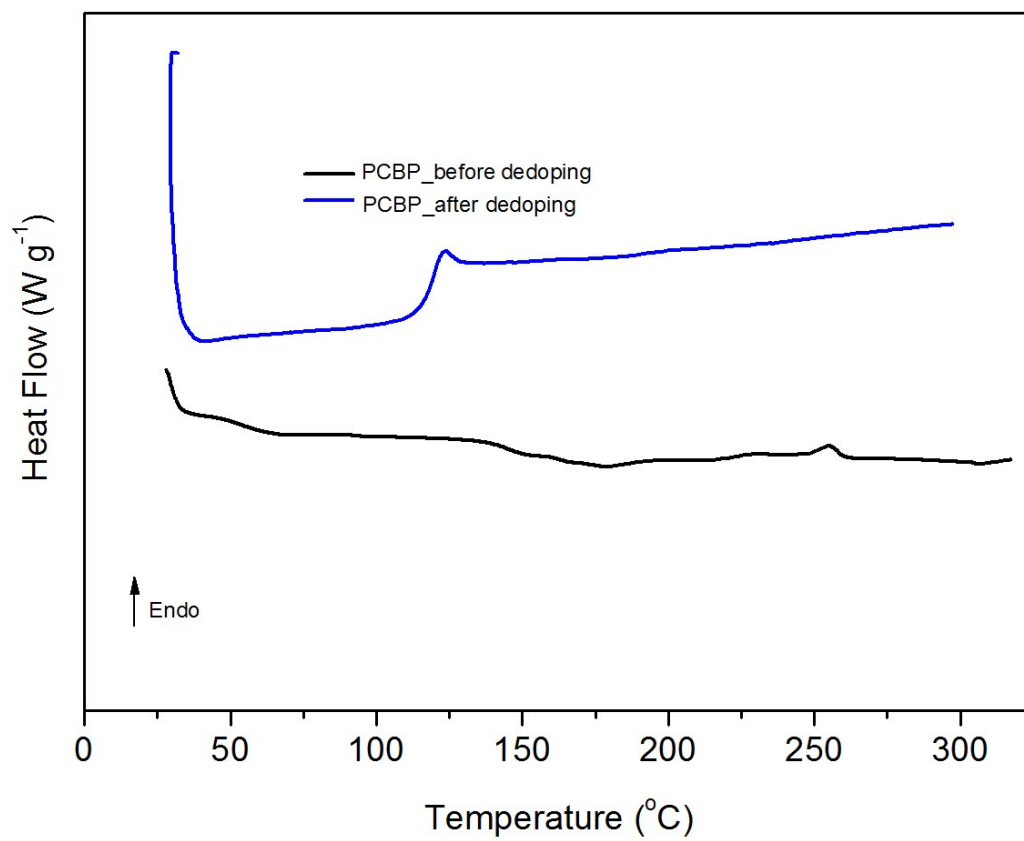

**Figure S3.** DSC curves of PCBP before and after dedoping process.
